# Supplementary material for: A minimal markerset for three‐dimensional foot function assessment: measuring navicular drop and drift under dynamic conditions
Source: Springer Nature journal article supplement (doi:10.1186/s13047-018-0257-2), 2018-01-01

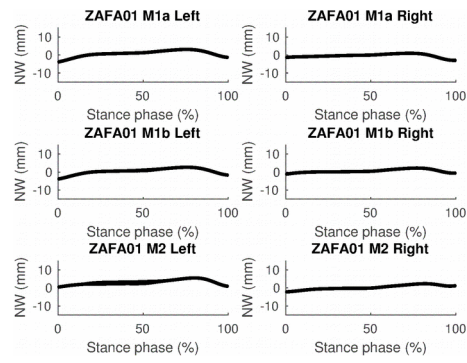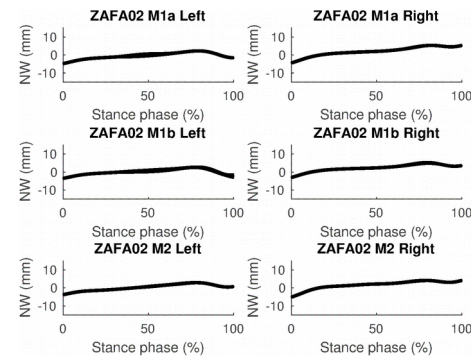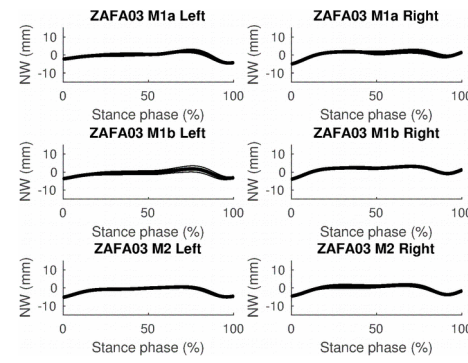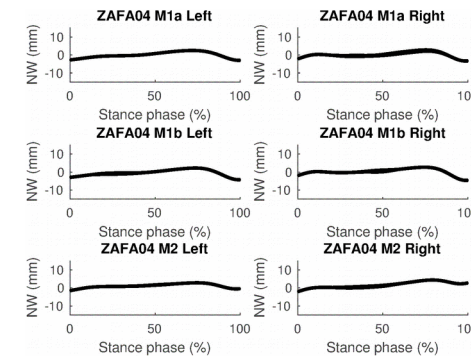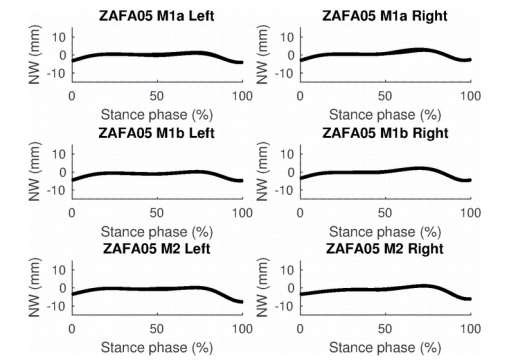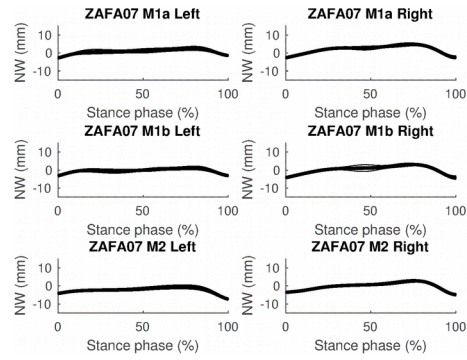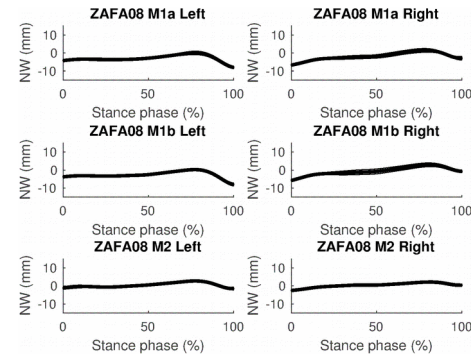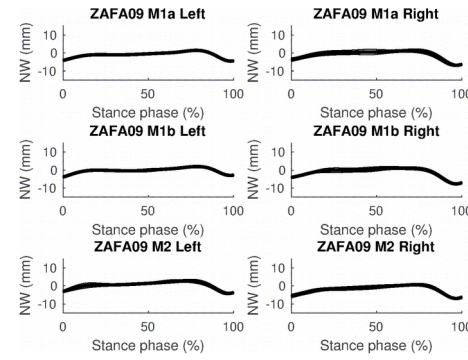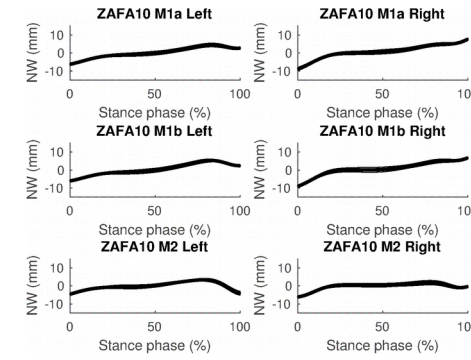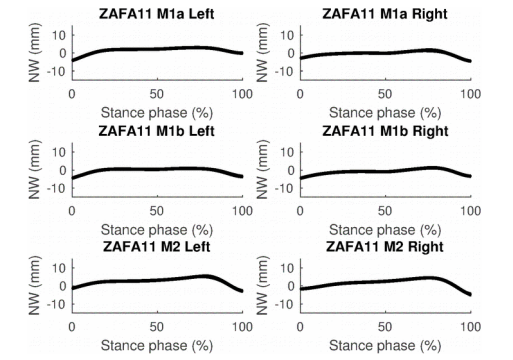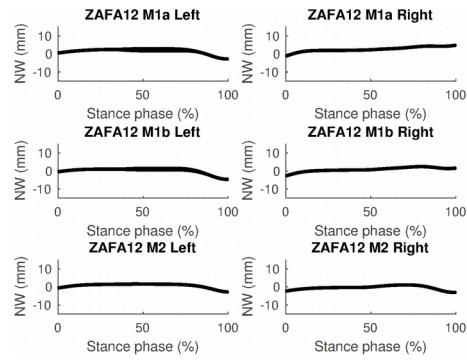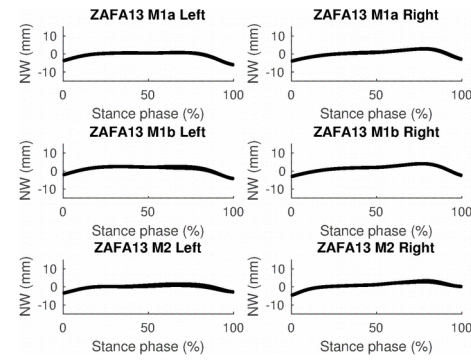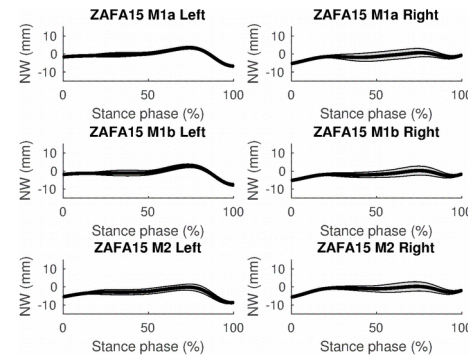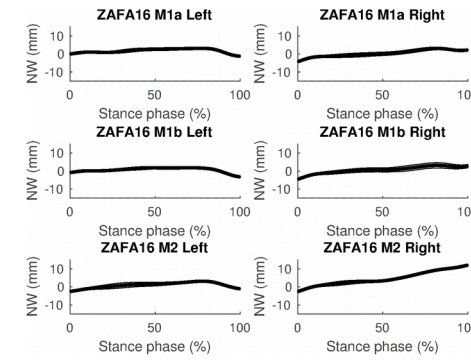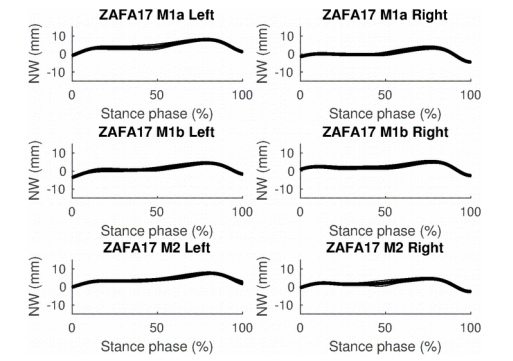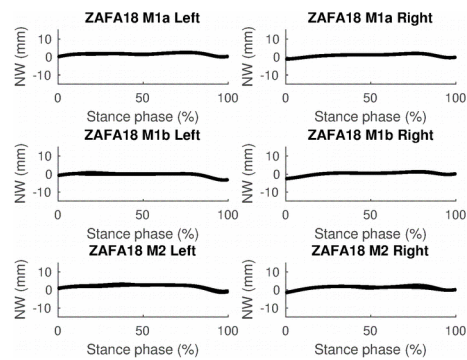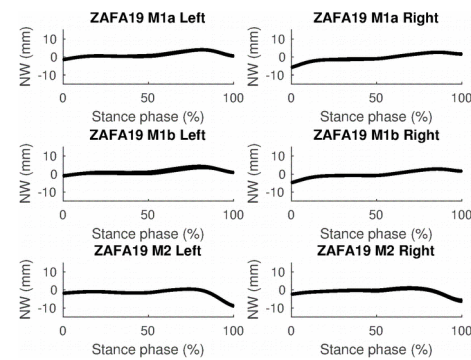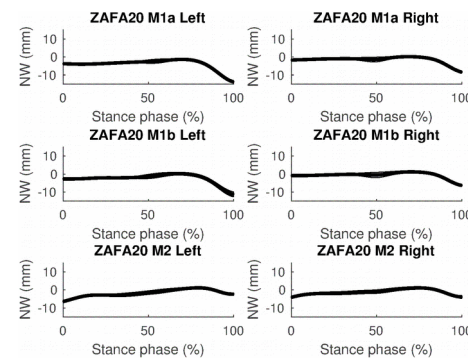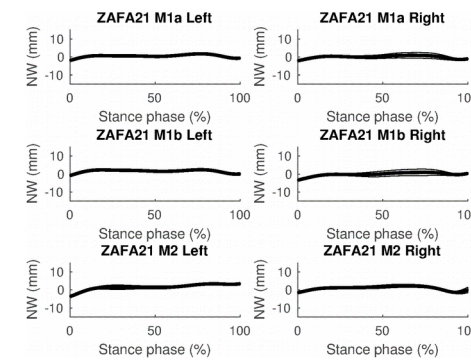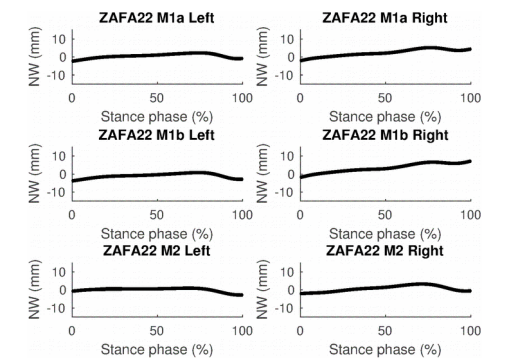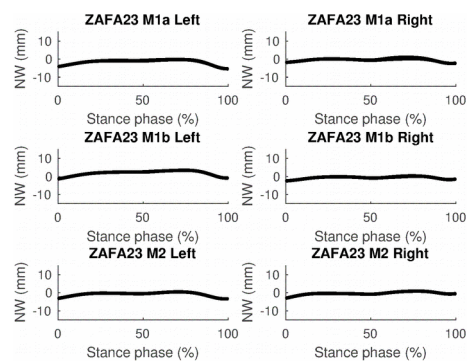

Supplement: MOESM3 [file 15705534]
