# Supplementary material for: A minimal markerset for three-dimensional foot function assessment: measuring navicular drop and drift under dynamic conditions
Source: J Foot Ankle Res. 2018 Apr 18;11:15. doi: 10.1186/s13047-018-0257-2 (PMC5907216; doi:10.1186/s13047-018-0257-2)
Supplement: Supplementary file 1 — Bland-Altman diagrams for navicular height and width at foot strike and minimum and maximum of navicular height and width, respectively, during stance. Bland-Altman diagrams for the time points of minimum navicular height and maximum navicular width are also presented. (PDF 711 kb) [file 13047_2018_257_MOESM1_ESM.pdf]

# Additional file 1

## Contents

|          |                                                                                                       |          |
|----------|-------------------------------------------------------------------------------------------------------|----------|
| <b>1</b> | <b>Bland-Altman diagrams of navicular height and width at foot strike</b>                             | <b>2</b> |
| <b>2</b> | <b>Bland-Altman diagrams of minimum navicular height and maximum navicular width</b>                  | <b>3</b> |
| <b>3</b> | <b>Bland-Altman diagrams from time points of minimum navicular height and maximum navicular width</b> | <b>4</b> |

# 1 Bland-Altman diagrams of navicular height and width at foot strike

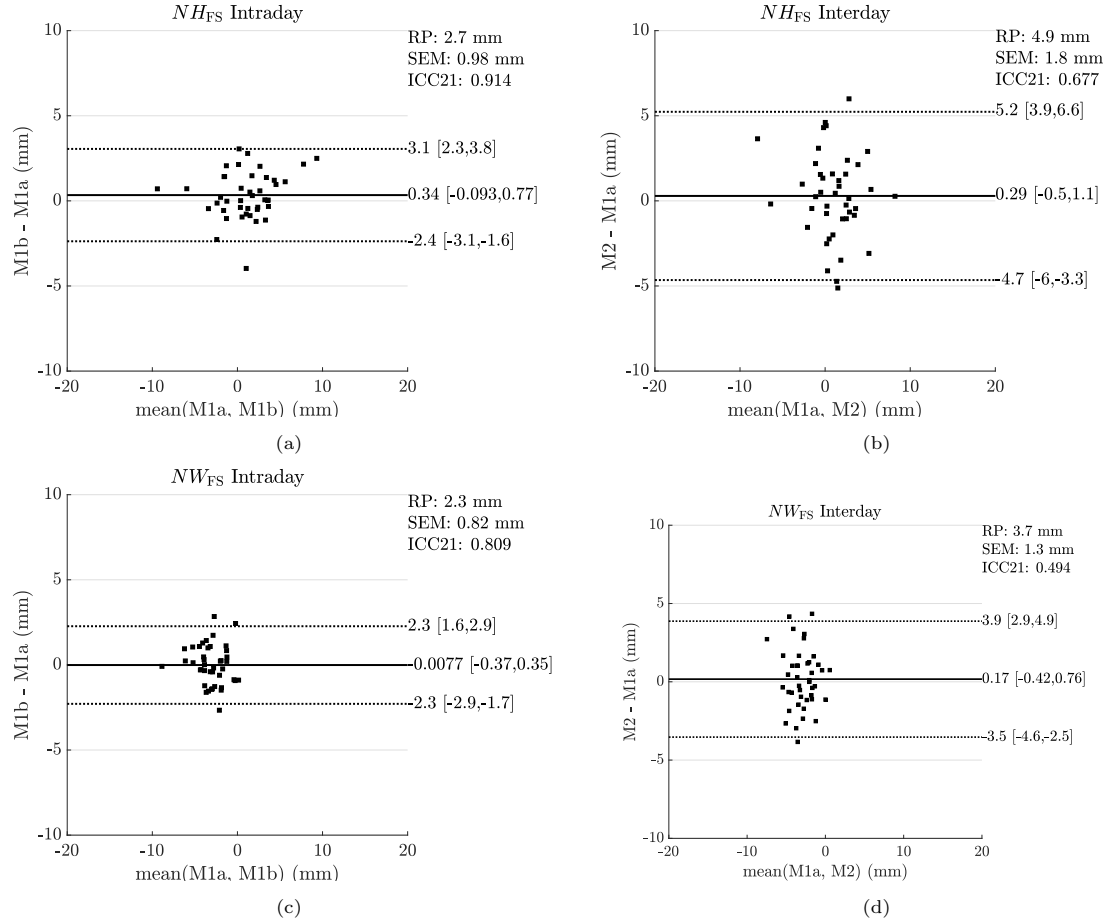

Figure 1: Bland-Altman diagrams with  $SEM$  and  $ICC_{21}$  for intra- and interday reliability of navicular height ( $NH_{FS}$ ) (a) (b) and width ( $NW_{FS}$ ) (c) (d) at foot strike.  $RP$  denotes the repeatability calculated as  $1.96 \times SDd$  (standard deviation of the differences). Solid black lines: bias; Dotted lines: limits of agreement (LoA) calculated as bias  $\pm RP$ ; Numbers in brackets: 95% confidence intervals of bias and LoAs, respectively.

## 2 Bland-Altman diagrams of minimum navicular height and maximum navicular width

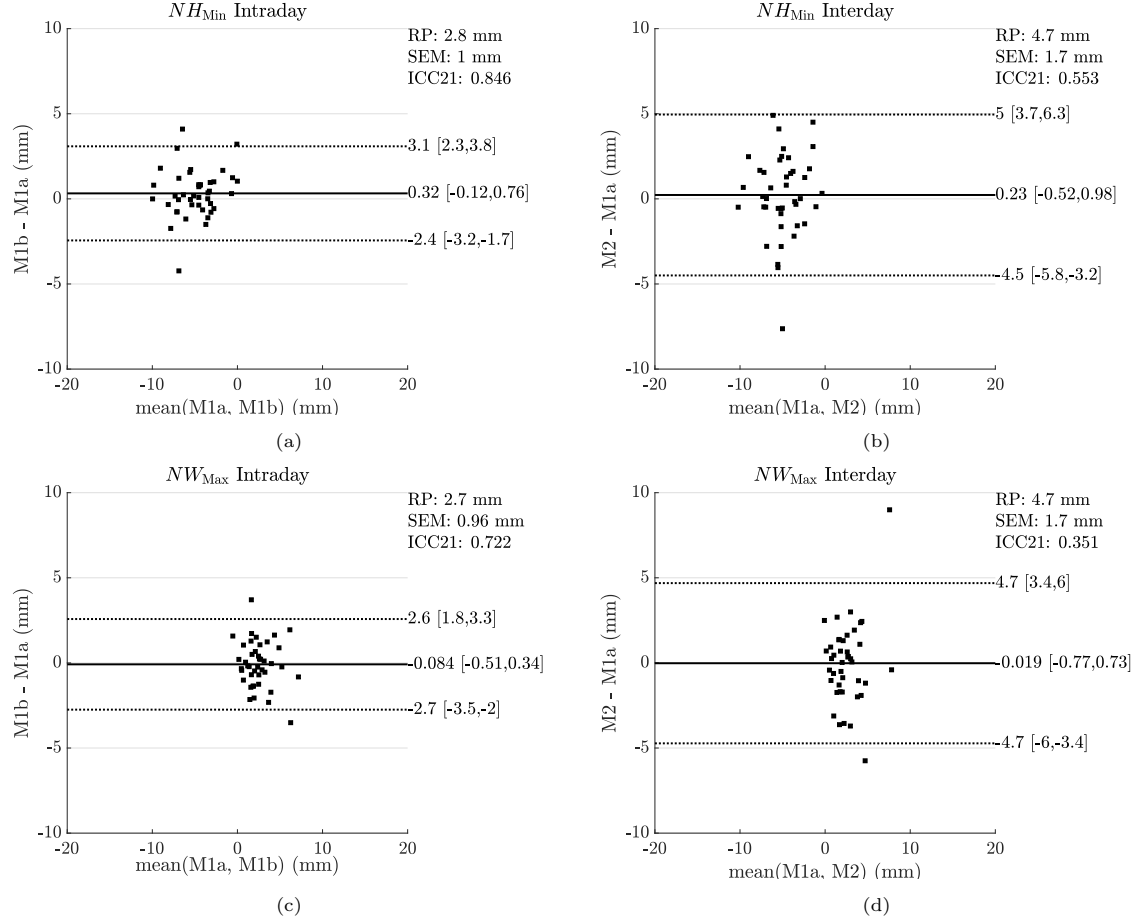

Figure 2: Bland-Altman diagrams with  $SEM$  and  $ICC_{21}$  for intra- and interday reliability of minimum navicular height ( $NH_{Min}$ ) (a) (b) and maximum navicular width ( $NW_{Max}$ ) (c) (d) during the stance phase.  $RP$  denotes the repeatability calculated as  $1.96 \times SDd$  (standard deviation of the differences). Solid black lines: bias; Dotted lines: limits of agreement (LoA) calculated as bias  $\pm RP$ ; Numbers in brackets: 95% confidence intervals of bias and LoAs, respectively.

### 3 Bland-Altman diagrams from time points of minimum navicular height and maximum navicular width

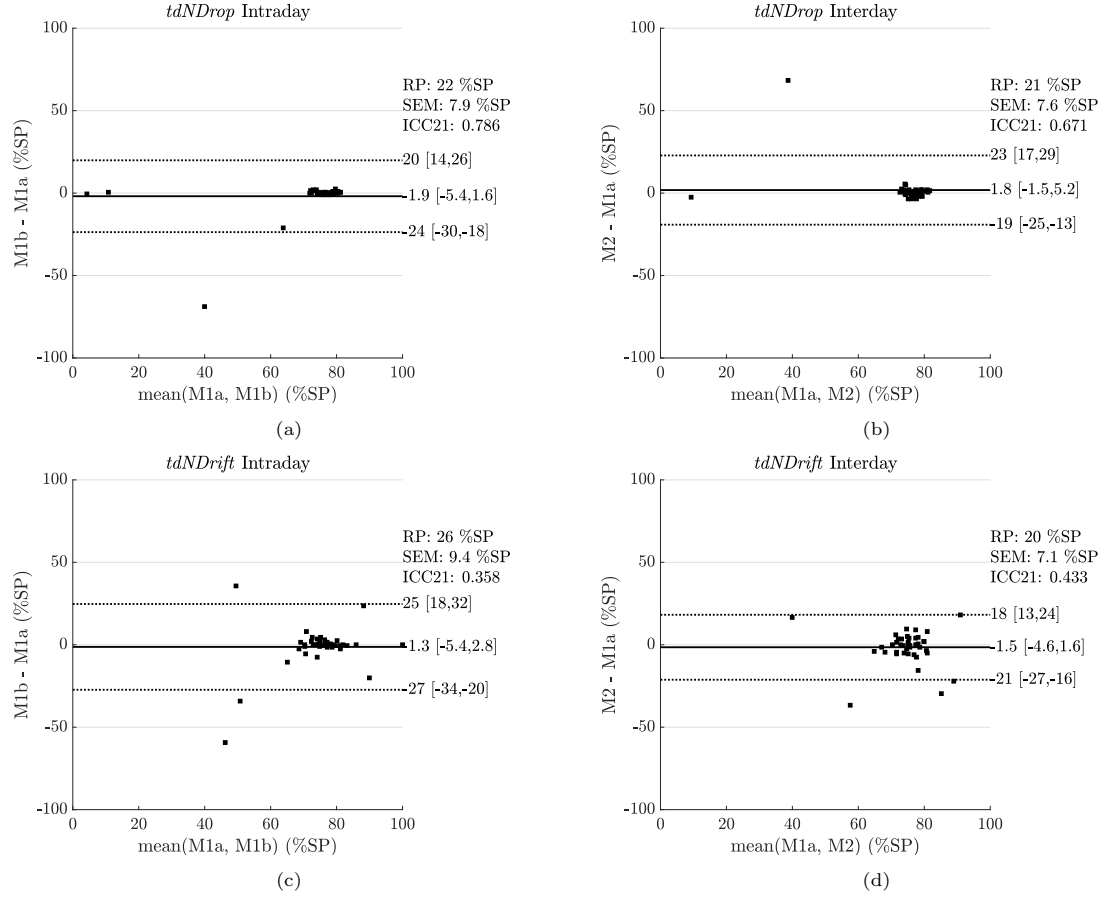

Figure 3: Bland-Altman diagrams with *SEM* and *ICC*<sub>21</sub> for intra- and interday reliability of the time points of dynamic navicular drop (*tdNDrop*) (a) (b) and drift (*tdNDrift*) (c) (d) during the stance phase. *RP* denotes the repeatability calculated as  $1.96 \times SDd$  (standard deviation of the differences). Solid black lines: bias; Dotted lines: limits of agreement (LoA) calculated as  $\text{bias} \pm RP$ ; Numbers in brackets: 95% confidence intervals of bias and LoAs, respectively.
